# Supplementary material
Source: MDPI journal article supplement (https://www.mdpi.com/2077-0472/13/1/133)
Supplement: s1 [file s1]

## Supplementary materials

**Table S1: The 16 treatments in the OSCAR experiment (Osinaike, [37])**

| Treatment | Tillage         | CC Cover crop / 1m Living mulch  | Organic amendment |
|-----------|-----------------|----------------------------------|-------------------|
|           | Factor I        | Factor II                        | Factor III        |
| 1         | Plowing         | Oilseed radish/lopsided oat (cc) | compost           |
| 2         | Plowing         | Oilseed radish/lopsided oat (cc) | None              |
| 3         | Plowing         | Summer vetch (cc)                | Compost           |
| 4         | Plowing         | Summer vetch (cc)                | None              |
| 5         | Plowing         | Subterranean clover (lm)         | Compost           |
| 6         | Plowing         | Subterranean clover (lm)         | None              |
| 7         | Plowing         | White clover (lm)                | Compost           |
| 8         | Plowing         | White clover (lm)                | None              |
| 9         | Reduced tillage | Oilseed radish/lopsided oat (cc) | Compost           |
| 10        | Reduced tillage | Oilseed radish/lopsided oat (cc) | None              |
| 11        | Reduced tillage | Summer vetch (cc)                | Compost           |
| 12        | Reduced tillage | Summer vetch (cc)                | None              |
| 13        | Reduced tillage | Subterranean clover (lm)         | Compost           |
| 14        | Reduced tillage | Subterranean clover (lm)         | None              |
| 15        | Reduced tillage | White clover (lm)                | Compost           |
| 16        | Reduced tillage | White clover (lm)                | none              |

**Table S2: Soil-management practices applied in the Long-Term field trial from September 2012 to July 2020**

| Year       | Date       | Crop         | Field operation                                                                                                                    | Differential operation in RT |
|------------|------------|--------------|------------------------------------------------------------------------------------------------------------------------------------|------------------------------|
| Since 2010 |            | Clover grass |                                                                                                                                    |                              |
| 2012       | 14.09.2012 | Clover grass | Mulching                                                                                                                           |                              |
| 2012       | 14.09.2012 |              | Cultivating                                                                                                                        |                              |
| 2012       | 17.09.2012 |              | Cultivating                                                                                                                        |                              |
| 2012       | 02.10.2012 |              | Plowing                                                                                                                            | Chisel plow 5 cm             |
| 2012       | 04.10.2012 |              | 5 t DM ha <sup>-1</sup> Compost application or fertilization with K and P equivalent amounts of potash sulfate and rock phosphate. |                              |

| Year | Date       | Crop              | Field operation                                                                                                                     | Differential operation in RT           |
|------|------------|-------------------|-------------------------------------------------------------------------------------------------------------------------------------|----------------------------------------|
| 2012 | 12.10.2012 | W-Wheat           | Sowing                                                                                                                              |                                        |
| 2013 | 25.04.2013 | W-Wheat           | Hoeing                                                                                                                              |                                        |
| 2013 | 06.05.2013 | W-Wheat           | Oversowing white clover 10 kg ha <sup>-1</sup> with harrow half of the plots                                                        |                                        |
| 2013 | 15.08.2013 | W-Wheat           | Harvest                                                                                                                             |                                        |
| 2013 | 06.09.2013 | Cover crop (CC)   | 1. ryegrass/oil radish and 2. winter vetch after shallow tillage                                                                    |                                        |
| 2014 | 14.03.2014 |                   | Undercutting with chisel plow                                                                                                       |                                        |
| 2014 | 07.04.2014 |                   | Chisel plowing                                                                                                                      |                                        |
| 2014 | 22.04.2014 |                   | Plowing                                                                                                                             | Chisel plowing 15 cm                   |
| 2014 | 24.04.2014 |                   | 10 t DM ha <sup>-1</sup> Compost application or fertilization with K and P equivalent amounts of potash sulfate and rock phosphate. |                                        |
| 2014 | 25.04.2014 |                   | Power harrow                                                                                                                        |                                        |
| 2014 | 26.04.2014 | Potatoes          | Planting                                                                                                                            |                                        |
| 2014 | 12.05.2014 | Potatoes          | Rotary hiller                                                                                                                       |                                        |
| 2014 | 20.05.2014 | Potatoes          | Rotary hiller                                                                                                                       |                                        |
| 2014 | 21.05.2014 | Potatoes          | Harrow                                                                                                                              |                                        |
| 2014 | 22.05.2014 | Potatoes          | Hilling                                                                                                                             |                                        |
| 2014 | 26.05.2014 | Potatoes          |                                                                                                                                     | 18 t ha <sup>-1</sup> DM rye-pea mulch |
| 2014 | 04.06.2014 | Potatoes          | Hilling                                                                                                                             |                                        |
| 2014 | 12.06.2014 | Potatoes          | Hilling                                                                                                                             |                                        |
| 2014 | 10.09.2014 | Potatoes          | Harvest                                                                                                                             |                                        |
| 2014 | 04.10.2014 |                   | Cultivating                                                                                                                         |                                        |
| 2014 | 16.10.2014 | CC Triticale      | Cultivating                                                                                                                         |                                        |
| 2014 | 21.10.2014 | CC Triticale      | Sowing                                                                                                                              |                                        |
| 2015 | 19.05.2015 | CC Triticale      | mulching                                                                                                                            |                                        |
| 2015 | 21.05.2015 |                   | Cultivating                                                                                                                         |                                        |
| 2015 | 28.05.2015 |                   | Cultivating                                                                                                                         |                                        |
| 2015 | 29.05.2015 |                   | Potash sulfate 400 kg ha <sup>-1</sup>                                                                                              |                                        |
| 2015 | 10.06.2015 |                   | Chisel Plow                                                                                                                         |                                        |
| 2015 | 12.06.2015 |                   | Rock phosphate 300 kg ha <sup>-1</sup> 27 %                                                                                         |                                        |
| 2015 | 12.06.2015 |                   | Liming 500 kg ha <sup>-1</sup>                                                                                                      |                                        |
| 2015 | 12.06.2015 | CC Berseem clover | Sowing 29 kg ha <sup>-1</sup>                                                                                                       |                                        |
| 2015 | 12.06.2015 | CC Berseem clover | Seedbed finishing by roller                                                                                                         |                                        |
| 2015 | 17.06.2015 | CC Berseem clover | Irrigation 25 mm                                                                                                                    |                                        |

| Year | Date       | Crop              | Field operation                                                                                | Differential operation in RT |
|------|------------|-------------------|------------------------------------------------------------------------------------------------|------------------------------|
| 2015 | 03.07.2015 | CC Berseem clover | Irrigation 25 mm                                                                               |                              |
| 2015 | 01.08.2015 | CC Berseem clover | Mulching                                                                                       |                              |
| 2015 | 26.10.2015 | CC Berseem clover | Mulching                                                                                       |                              |
| 2015 | 26.10.2015 |                   | Plowing (20 cm)                                                                                | Cultivating                  |
| 2015 | 27.10.2015 |                   | Liming 600 kg ha <sup>-1</sup>                                                                 |                              |
| 2015 | 27.10.2015 |                   | Cultivating                                                                                    |                              |
| 2015 | 27.10.2015 | Triticale         | Sowing 200 kg ha <sup>-1</sup> , 25 cm row spacing, mixture of four varieties                  |                              |
| 2016 | 24.03.2016 | Triticale         | Hoeing                                                                                         |                              |
| 2016 | 09.08.2016 | Triticale         | Harvest                                                                                        |                              |
| 2016 | 15.08.2016 |                   | Straw swathing                                                                                 |                              |
| 2016 | 17.08.2016 |                   | Straw baling and removal                                                                       |                              |
| 2016 | 30.08.2016 |                   | Cultivating, shallow                                                                           |                              |
| 2016 | 06.09.2016 |                   | Plowing 21 cm                                                                                  | Chisel plow 5 cm             |
| 2016 | 07.09.2016 |                   | Cultivating                                                                                    | Chisel plow 5 cm             |
| 2016 | 07.09.2016 |                   | Liming 500 kg ha <sup>-1</sup>                                                                 |                              |
| 2016 | 07.09.2016 |                   | Power harrow                                                                                   |                              |
| 2016 | 15.09.2016 | Mustard CC        | Sowing                                                                                         |                              |
| 2016 | 28.09.2016 |                   | Cultivating                                                                                    |                              |
| 2016 | 29.09.2016 |                   | Seedbed finishing by roller                                                                    |                              |
| 2016 | 10.10.2016 |                   | Cultivating                                                                                    |                              |
| 2016 | 15.10.2016 |                   | Seedbed preparation                                                                            |                              |
| 2016 | 17.10.2016 | W-Wheat           | Sowing, half the ploits undersown with white clover with harrow 7 kg ha <sup>-1</sup> (failed) |                              |
| 2017 | 29.03.2017 | W-Wheat           | Cambridge roller 3 m                                                                           |                              |
| 2017 | 27.04.2017 | W-Wheat           | Hoeing and harrow                                                                              |                              |
| 2017 | 10.05.2017 | W-Wheat           | White clover undersowing with harrow 7.5 kg ha <sup>-1</sup> , half of the plots (failed)      |                              |
| 2017 | 04.08.2017 | W-Wheat           | Harvest                                                                                        |                              |
| 2017 | 07.08.2017 | W-Wheat           | Straw swathing                                                                                 |                              |
| 2017 | 08.08.2017 | W-Wheat           | Baling straw                                                                                   |                              |
| 2017 | 09.08.2017 | W-Wheat           | Cultivating                                                                                    |                              |
| 2017 | 18.09.2017 |                   | Cultivating                                                                                    | Cultivating                  |
| 2017 | 22.09.2017 |                   | Plowing (15 cm)                                                                                |                              |
| 2017 | 23.09.2017 |                   |                                                                                                | Shallow rotary hoe ca. 5 cm  |
| 2017 | 26.09.2017 |                   | Liming 500 kg ha <sup>-1</sup>                                                                 |                              |

| Year | Date       | Crop                      | Field operation                                                                                                                    | Differential operation in RT |
|------|------------|---------------------------|------------------------------------------------------------------------------------------------------------------------------------|------------------------------|
| 2017 | 26.09.2017 |                           | Cultivating (7-10 cm)                                                                                                              |                              |
| 2017 | 29.09.2017 |                           | 5 t DM ha <sup>-1</sup> Compost application or fertilization with K and P equivalent amounts of potash sulfate and rock phosphate. |                              |
| 2017 | 17.10.2017 |                           | Cultivating                                                                                                                        |                              |
| 2017 | 18.10.2017 | Vetch triticales CC       | Sowing, 210 kg ha <sup>-1</sup> 30 % Vetch, 70 % Triticale                                                                         |                              |
| 2018 | 27.04.2018 |                           | termination with Rotary hoe ca.5 cm                                                                                                |                              |
| 2018 | 27.04.2018 |                           | Shallow cultivating ca.7 cm                                                                                                        |                              |
| 2018 | 28.04.2018 |                           | 5 t DM ha <sup>-1</sup> Compost application or fertilization with K and P equivalent amounts of potash sulfate and rock phosphate. |                              |
| 2018 | 28.04.2018 |                           | Shallow cultivating ca.7 cm                                                                                                        |                              |
| 2018 | 28.04.2018 | Potatoes                  | Planting                                                                                                                           |                              |
| 2018 | 14.05.2018 | Potatoes                  | Fertilization 100 kg ha <sup>-1</sup> N as Phytoperls                                                                              |                              |
| 2018 | 15.05.2018 | Potatoes                  | Potatoes hilling                                                                                                                   |                              |
| 2018 | 18.05.2018 | Potatoes                  | 11 t ha <sup>-1</sup> DM triticales-vetch mulch on half of the plowed and half of the RT plots                                     |                              |
| 2018 | 26.05.2018 | Potatoes                  | Harrow in unmulched plots                                                                                                          |                              |
| 2018 | 06.06.2018 | Potatoes                  | Hilling in unmulched plots                                                                                                         |                              |
| 2018 | 30.08.2018 | Potatoes                  | Irrigation to enable harvesting 15 mm                                                                                              |                              |
| 2018 | 31.08.2018 | Potatoes                  | Irrigation to enable harvesting 15 mm                                                                                              |                              |
| 2018 | 03.09.2018 | Potatoes                  | Harvest potatoes                                                                                                                   |                              |
| 2018 | 10.09.2018 |                           | Disc harrow                                                                                                                        |                              |
| 2018 | 27.09.2018 |                           | Deep plowing                                                                                                                       |                              |
| 2018 | 28.09.2018 |                           | Liming 500 kg ha <sup>-1</sup>                                                                                                     |                              |
| 2018 | 28.09.2018 |                           | Plowing 20 cm                                                                                                                      | Cultivating 10 cm            |
| 2018 | 01.10.2018 | Brassica rapa CC          | Sowing Brassica rapa 50 cm row                                                                                                     |                              |
| 2018 | 14.11.2018 |                           | Turnover of rapeseed (due to poor emergence) Cabbage flea damage                                                                   |                              |
| 2018 | 15.11.2018 | Winter rye CC             | Sowing 200 kg ha <sup>-1</sup>                                                                                                     |                              |
| 2019 | 17.04.2019 | termination of cover crop | termination with Rotary hoe ca.5 cm                                                                                                |                              |

| Year | Date       | Crop                    | Field operation                                                                                 | Differential operation in RT |
|------|------------|-------------------------|-------------------------------------------------------------------------------------------------|------------------------------|
| 2019 | 18.04.2019 |                         | Fertilizing sulphur 100 kg ha <sup>-1</sup>                                                     |                              |
| 2019 | 19.04.2019 |                         | Cultivating                                                                                     |                              |
| 2019 | 23.04.2019 | Spring wheat            | Sowing 180 kg ha <sup>-1</sup> + 1kg Berseem clover and 10 kg Green Carbon fix ha <sup>-1</sup> |                              |
| 2019 | 23.04.2019 | Spring wheat            | Prisma roller                                                                                   |                              |
| 2019 | 17.07.2019 | Spring wheat            | Mulching (wheat failure due to drought)                                                         |                              |
| 2019 | 01.08.2019 |                         | Plowing 25 cm                                                                                   | Cultivating                  |
| 2019 | 04.08.2019 |                         | Cultivating                                                                                     | Cultivating                  |
| 2019 | 05.08.2019 |                         | Liming 2000 kg ha <sup>-1</sup>                                                                 |                              |
| 2019 | 06.08.2019 | Alfalfa clover grass CC | Sowing                                                                                          |                              |
| 2019 | 06.08.2019 | Alfalfa clover grass CC | Prisma roller                                                                                   |                              |
| 2019 | 14.10.2019 | Alfalfa clover grass CC | Mulching                                                                                        |                              |
| 2020 | 06.05.2020 | Alfalfa clover grass CC | Mulching                                                                                        |                              |
| 2020 | 06.05.2020 |                         | Termination with rotary hoe                                                                     |                              |
| 2020 | 16.05.2020 |                         | Chisel plow 5 cm                                                                                |                              |
| 2020 | 20.05.2020 |                         | Shallow and rapid rotary hoe                                                                    |                              |
| 2020 | 26.08.2020 |                         | Plowing 25 cm                                                                                   |                              |

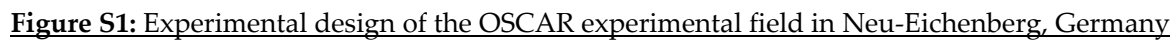

OSCAR field setup. Plow tillage, Wenz= Reduced tillage, SC subsidiary crop, CC cover crop, LM living mulch, WW and WS winter-wheat and white clover or subterranean clover, WV and WB winter-wheat and vetch or *Brassica*, + with compost, - no compost.
